# Supplementary material for: Diversification of cytokinin phosphotransfer signaling genes in Medicago truncatula and other legume genomes
Source: BMC Genomics. 2019 May 14;20:373. doi: 10.1186/s12864-019-5724-z (PMC6518804; doi:10.1186/s12864-019-5724-z)
Supplement: Supplementary file 18 — List of primers used. (XLSX 14 kb) [file 12864_2019_5724_MOESM18_ESM.xlsx]

## Sheet: Primers used
		Forward (F) primers (5' -> 3')		Reverse (R) primers (5' -> 3')
	reference genes	Actin-F	TGGCATCACTCAGTACCTTTCAACAG	Actin-R	ACCCAAAGCATCAAATAATAAGTCAACC
		RBP1-F	AGGGGCAAGTTCCTTCATTT	RBP1-R	AAACGGACGGAAAATGTGAG
	RRB	RRB1-F	GCTGAAGTTCACATGCCTGA	RRB1-R	CAGCTCCACAGACCAAACAA
		RRB2-F	GGTGTAACACACGGTGCTTG	RRB2-R	ATCAGATGCCTTCGGATGTC
		RRB3-F	TGGTGCCTGTGATTATCTGC	RRB3-R	CCTCGTCTTCGTCTTCATCC
		RRB6-F	CCGCGAGTTGTTTGGTCTAT	RRB6-R	TCTGAAGATGACTGGCAACG
		RRB9-F	GCCTCAAACCTCCTTCAATG	RRB9-R	TGTCCACCACCATCAACAGT
		RRB24-F	ATTATCCCGCTCCTTCAACC	RRB24-R	TGTTCCCCACTTTCTTTTTCC
	RRA	RRA2-F	TGGTGATGTTCTCAGGCAGA	RRA2-R	TGTCACCATCCAAACCAAGA
		RRA3-F	GGAAGAAGGGGCAGAAGAGT	RRA3-R	TCTGGAGGCTCAGGAGACAT
		RRA4-F	ATGCTTTTGTTCCGGGTTTA	RRA4-R	CTGCACCTTCCTCCAAACAT
		RRA5-F	TGGCTGCAGAGTCACAGTTT	RRA5-R	TCACCTCCACTTCCTGATGA
		RRA8-F	AGATTCCAGTGGTGATCATGTCG	RRA8-R	GCTCCTTCCTCCAAACACCTATC
		RRA9-F	TCCTCAGAGAATGTCCATCAAGG	RRA9-R	TGTGGTTTCAGCTTGTTCACATC
		RRA11-F	CCTCGGAGAATGTTCCATCTAGG	RRA11-R	GGCTTCAGCTTGCTTACATCTG
